# Supplementary material
Source: Springer Nature journal article supplement (http://www.springermedizin.de/resource/supplementary/13049_2008_23_MOESM2_ESM.pdf/9665794)
Supplement: MOESM2 [file 9665794]

# Operative vs non-operative management

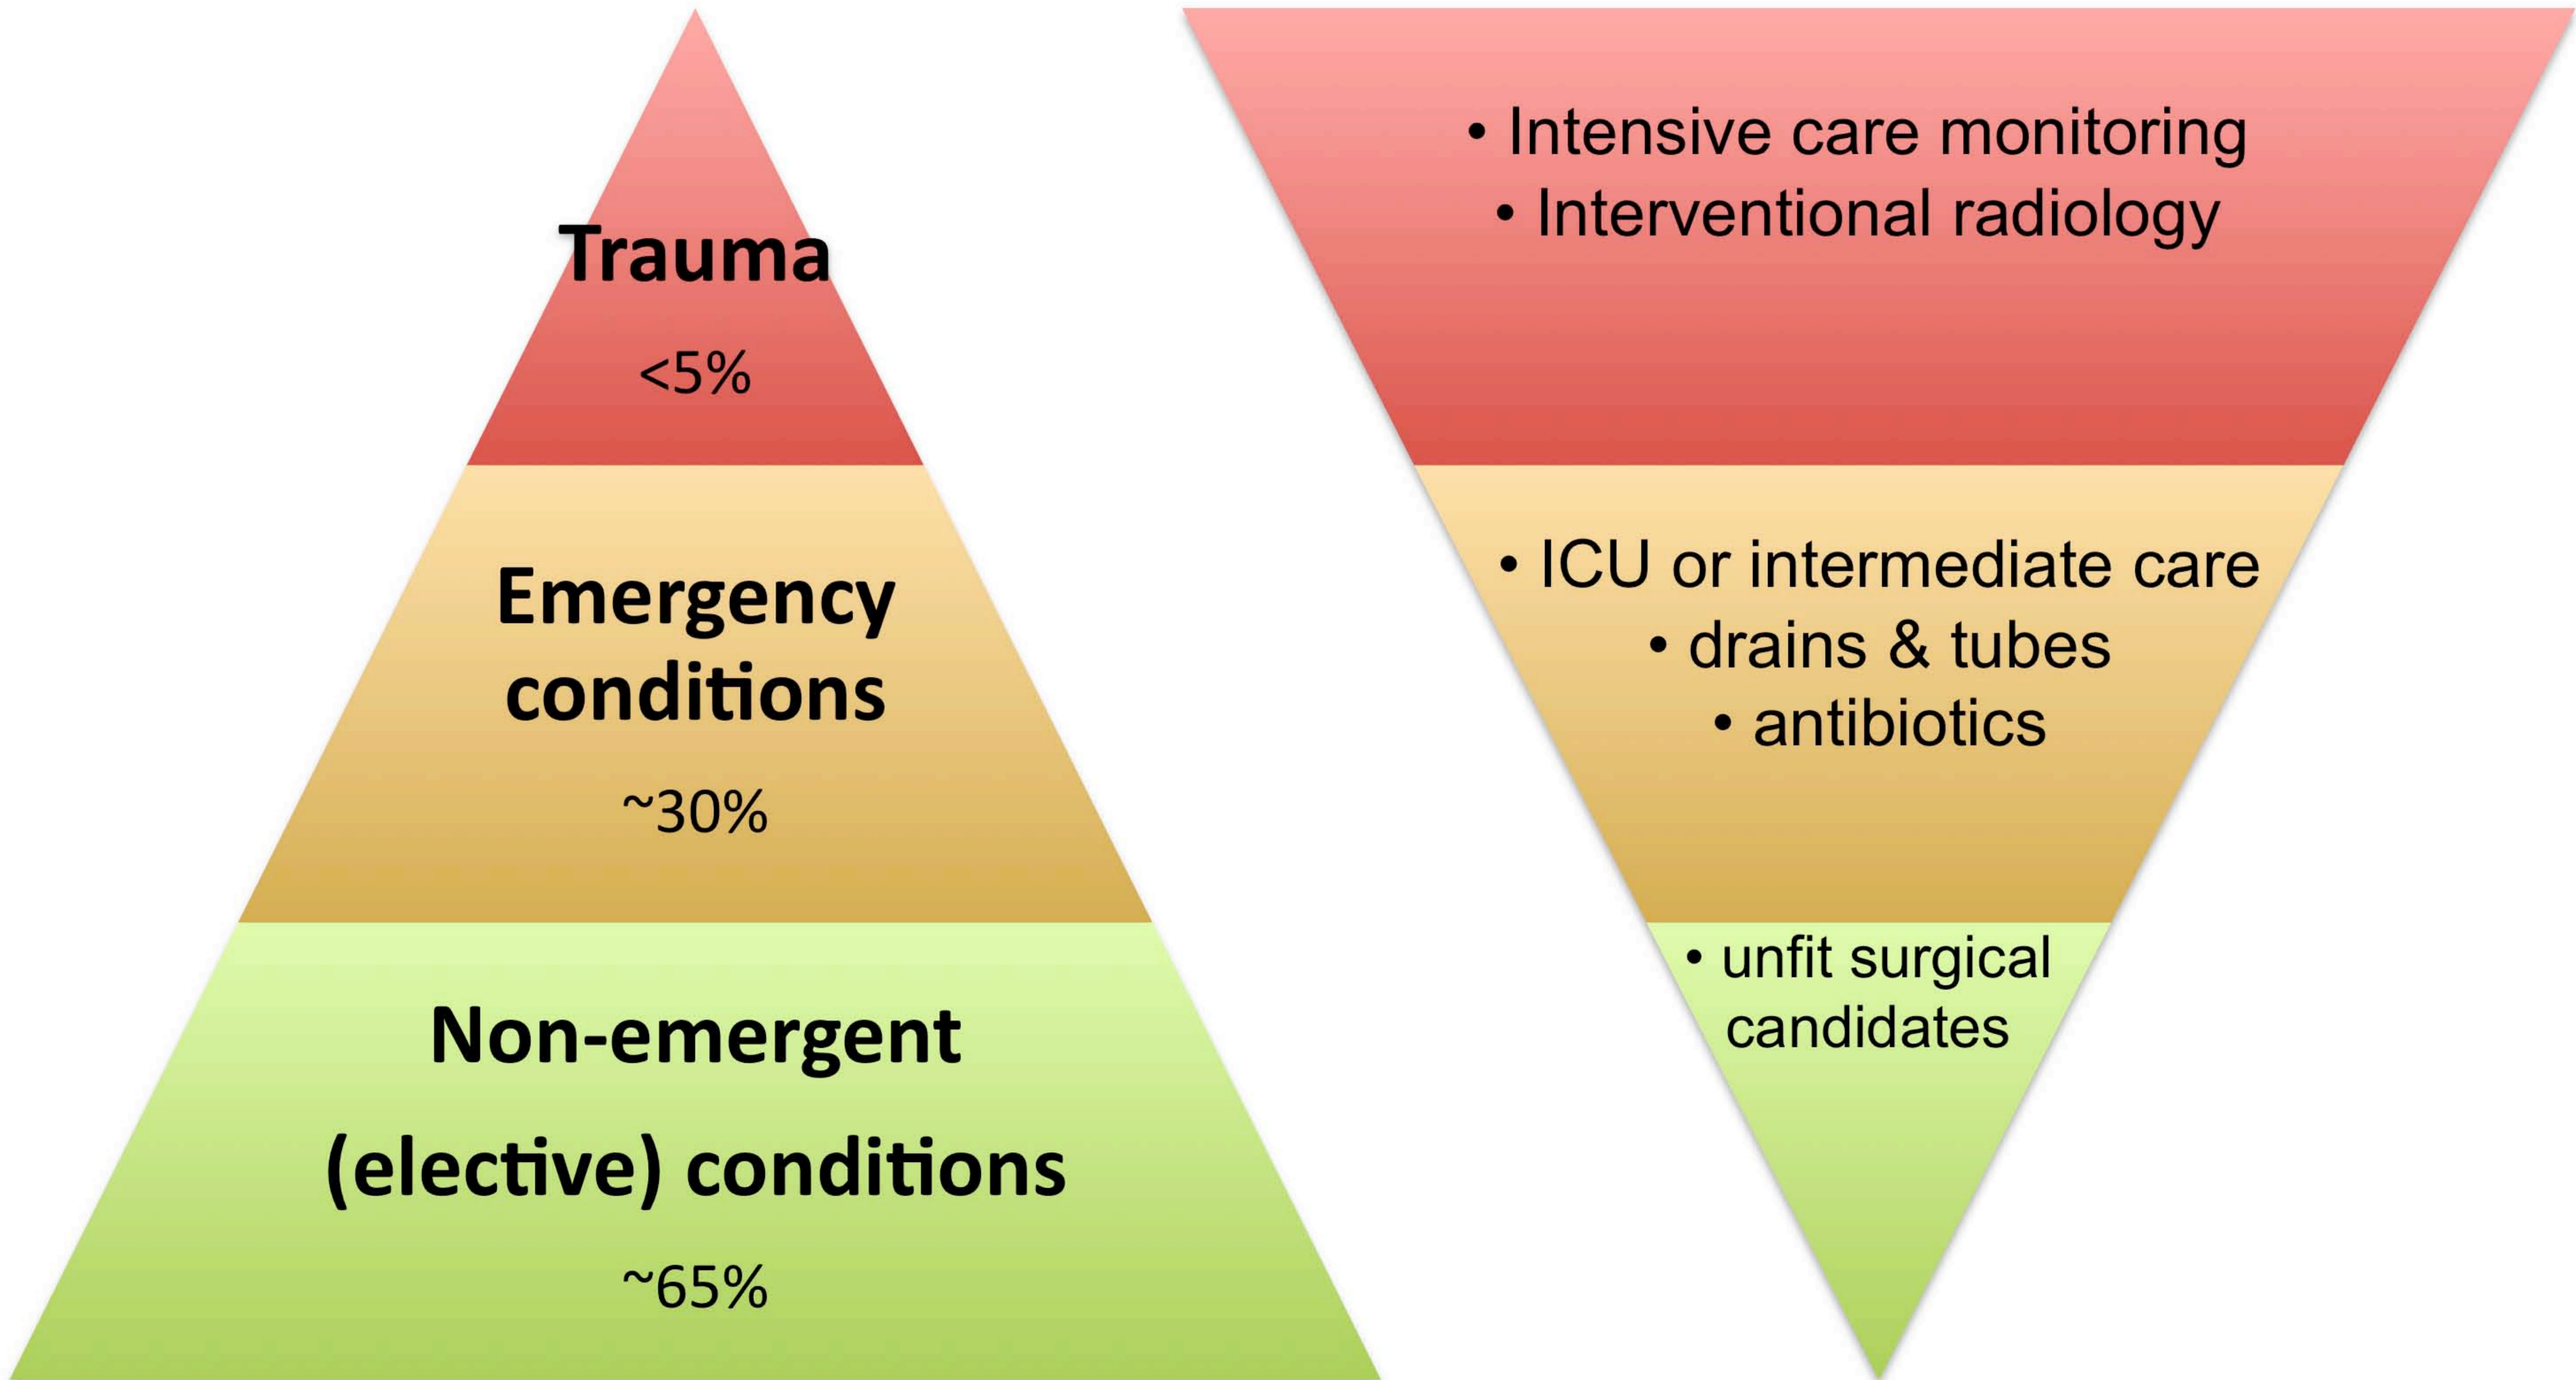

**Trauma**

<5%

**Emergency conditions**

~30%

**Non-emergent  
(elective) conditions**

~65%

- Intensive care monitoring
- Interventional radiology

- ICU or intermediate care
- drains & tubes
- antibiotics

- unfit surgical candidates
